# Supplementary material for: Epigenetic differences in the tumor suppressor genes MLH1 and p16INK4a between Nepalese and Swedish patients with colorectal cancer
Source: publisher site journal article supplement (doi:10.1515/iss-2023-0039), 2024-07-02
Supplement: Supplementary file [file j_iss-2023-0039_suppl_001.pdf]

# Epigenetic differences in the tumor suppressor genes *MLH1* and *p16INK4a* between Nepalese and Swedish patients with colorectal cancer

Bikal Ghimire, Göran Kurlberg, Peter Falk, Yogendra Singh and Yvonne Wettergren

## Supplementary material

**Supplementary Table 1. Comparison of methylation levels in matching FFPE and fresh-frozen tumor tissue.**

| Assay                    | Case | Methylation (%) at respective CpG site |                |
|--------------------------|------|----------------------------------------|----------------|
|                          |      | FFPE                                   | Fresh-frozen   |
| <i>MLH1</i>              | 1    | 13,10,5,7,8                            | 18,13,6,10,10  |
| <i>MLH1</i>              | 2    | 3,2,2,3,2                              | 4,1,1,1,1      |
| <i>MGMT</i> <sup>a</sup> | 3    | 88,86,100,86,100                       | 80,73,91,82,86 |
| <i>p16INK4a</i>          | 4    | 40,41,39,40,35                         | 63,51,52,56,48 |
| LINE-1 <sup>b</sup>      | 5    | 67,61,69                               | 61,64,67       |

<sup>a</sup>PyroMark Q24 CpG MGMT methylation detection assay, Cat. No. 970032

<sup>b</sup>PyroMark Q24 CpG LINE-1 methylation detection assay, Cat. No. 970042

**Supplementary Table 2. Number of cases with *MLH1* hypermethylation at respective CpG site in tumor and mucosa.**

|               | Nepalese patients |      | Swedish patients |      |
|---------------|-------------------|------|------------------|------|
|               | (n = 39)          |      | (n = 39)         |      |
|               | No. of cases      | (%)  | No. of cases     | (%)  |
| <i>Mucosa</i> |                   |      |                  |      |
| CpG site 1    | 12                | 30.8 | 1                | 2.6  |
| CpG site2     | 12                | 30.8 | 1                | 2.6  |
| CpG site3     | 11                | 28.2 | 1                | 2.6  |
| CpG site4     | 11                | 28.2 | 1                | 2.6  |
| CpG site 5    | 12                | 30.8 | 1                | 2.6  |
| <i>Tumor</i>  |                   |      |                  |      |
| CpG site 1    | 5                 | 12.8 | 8                | 20.5 |
| CpG site 2    | 6                 | 15.4 | 6                | 15.4 |
| CpG site 3    | 4                 | 10.3 | 6                | 15.4 |
| CpG site 4    | 4                 | 10.3 | 6                | 15.4 |
| CpG site 5    | 5                 | 12.8 | 7                | 18.0 |

**Supplementary Table 3. Percentage of patients with *MLH1* hypermethylation at respective CpG site by age group.**

| <b>Percentage of patients with <i>MLH1</i> hypermethylation in mucosa</b> |                   |         |                   |         |                   |         |                   |         |                   |         |
|---------------------------------------------------------------------------|-------------------|---------|-------------------|---------|-------------------|---------|-------------------|---------|-------------------|---------|
| <b>Age group<sup>a</sup></b>                                              | <i>CpG site 1</i> |         | <i>CpG site 2</i> |         | <i>CpG site 3</i> |         | <i>CpG site 4</i> |         | <i>CpG site 5</i> |         |
|                                                                           | Nepalese          | Swedish | Nepalese          | Swedish | Nepalese          | Swedish | Nepalese          | Swedish | Nepalese          | Swedish |
| <50 years                                                                 | 25.0              | 9.1     | 25.0              | 9.1     | 16.7              | 9.1     | 25.0              | 9.1     | 25.0              | 9.1     |
| 50-60 years                                                               | 33.3              | 0       | 33.3              | 0       | 33.3              | 0       | 20.0              | 0       | 26.7              | 0       |
| >60 years                                                                 | 41.7              | 0       | 41.7              | 0       | 41.7              | 0       | 50.0              | 0       | 50.0              | 0       |

  

| <b>Percentage of patients with <i>MLH1</i> hypermethylation in tumor</b> |                   |         |                   |         |                   |         |                   |         |                   |         |
|--------------------------------------------------------------------------|-------------------|---------|-------------------|---------|-------------------|---------|-------------------|---------|-------------------|---------|
| <b>Age group<sup>a</sup></b>                                             | <i>CpG site 1</i> |         | <i>CpG site 2</i> |         | <i>CpG site 3</i> |         | <i>CpG site 4</i> |         | <i>CpG site 5</i> |         |
|                                                                          | Nepalese          | Swedish | Nepalese          | Swedish | Nepalese          | Swedish | Nepalese          | Swedish | Nepalese          | Swedish |
| <50 years                                                                | 8.3               | 18.2    | 8.3               | 9.1     | 8.3               | 9.1     | 8.3               | 9.1     | 8.3               | 9.1     |
| 50-60 years                                                              | 20.0              | 12.5    | 26.7              | 6.2     | 13.3              | 6.2     | 13.3              | 6.2     | 20.0              | 12.5    |
| >60 years                                                                | 25.0              | 33.3    | 25.0              | 33.3    | 8.3               | 33.3    | 16.7              | 33.3    | 8.3               | 33.3    |

<sup>a</sup>The number of Nepalese patients <50 years, 50 – 60 years, and >60 years of age were 12, 15, and 12, respectively, whereas the number of Swedish patients were 11, 16, and 12, respectively.

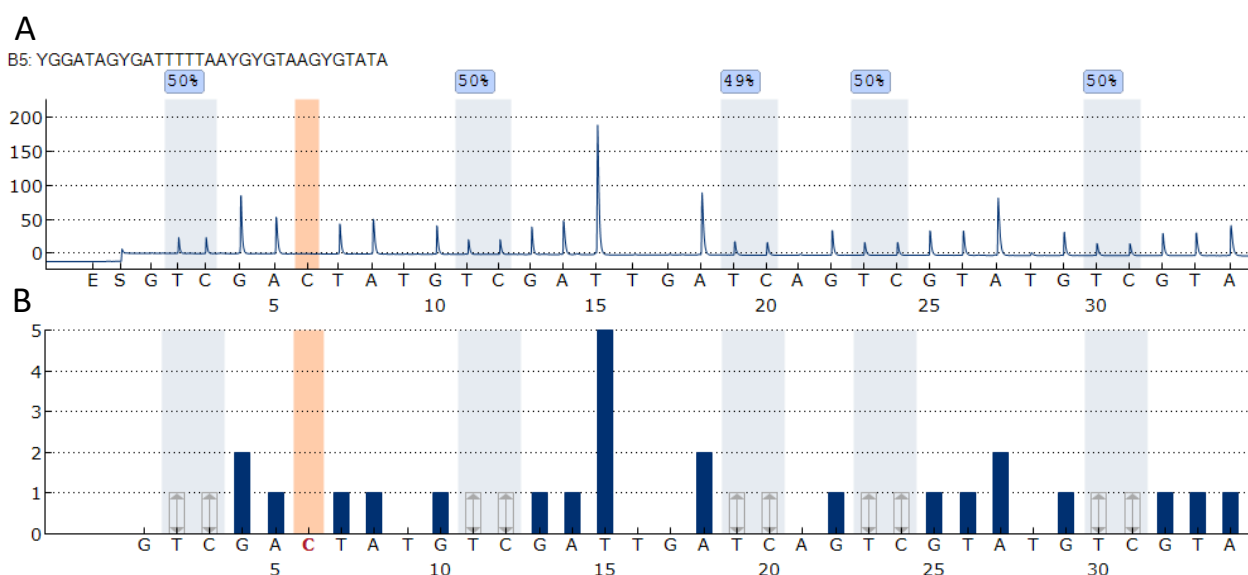

**Supplementary Figure 1.** A) Pyrogram showing percent methylation at each analysed *MLH1* CpG site in a mucosa sample of a Nepalese patient, and B) Histogram for the *MLH1* assay. Controls for completion of bisulfite treatment are highlighted in orange.

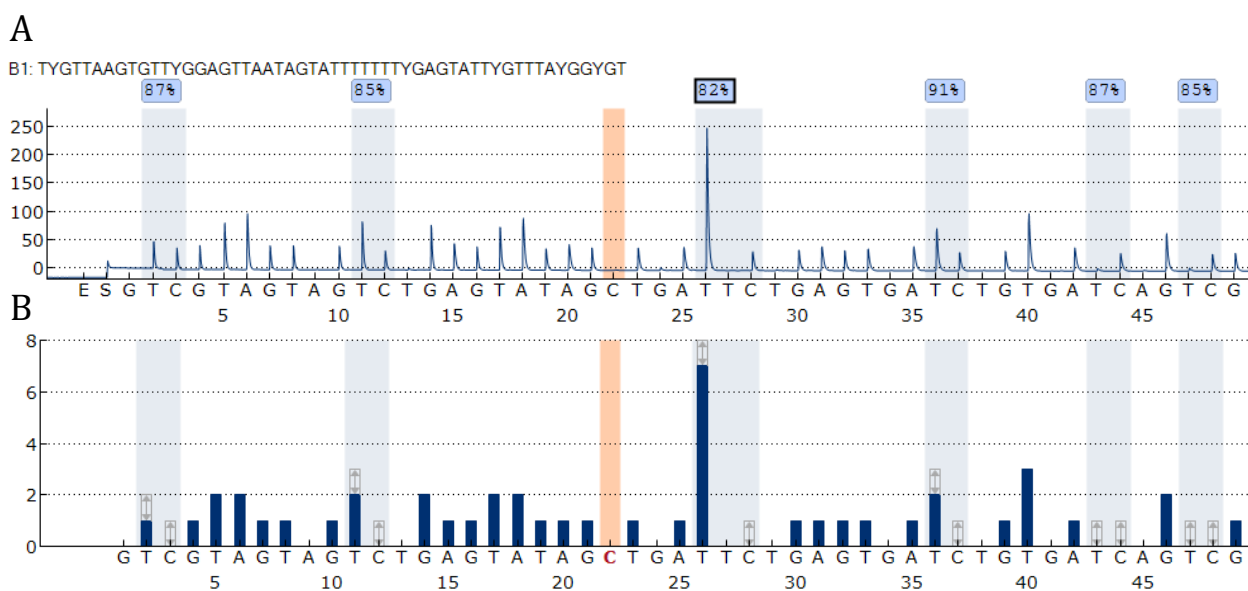

**Supplementary Figure 2.** A) Pyrogram showing percent methylation at each analysed *p16INK4a* CpG site in a tumor sample of a Nepalese patient, and B) Histogram for the *p16INK4a* assay. Controls for completion of bisulfite treatment are highlighted in orange.

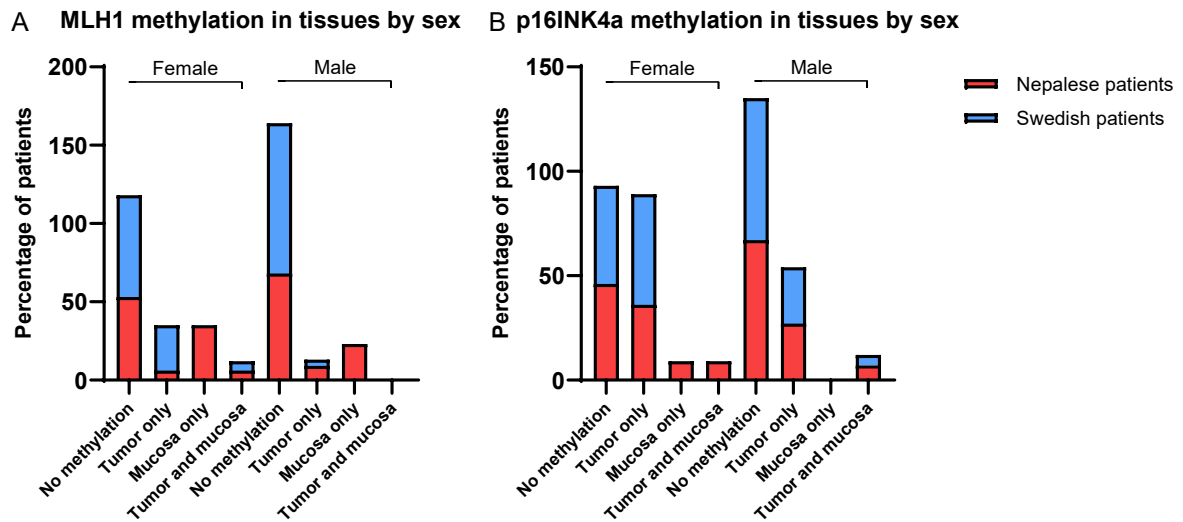

**Supplementary Figure 3.** Bars and boxes comparing A) the *MLH1* and B) the *p16INK4a* methylation status in tissues deriving from Nepalese and Swedish patients with colorectal cancer by sex. The methylation status is classified as follows: no methylation, methylation only in tumor tissue, methylation only in mucosal tissue, or methylation in both tumor and mucosa.
